# Supplementary material for: Microfluidics-Based Drying–Wetting Cycles to Investigate Phase Transitions of Small Molecules Solutions
Source: MDPI journal article supplement (doi:10.3390/life14040472), 2024-04-04
Supplement: s1 [file s1]

# Microfluidics Based Drying-Wetting Cycles to Investigate Phase Transitions of Small Molecules Solutions

Ajay Verma <sup>1</sup>, Tiphaine Mateo <sup>1</sup>, Juan Quintero Botero <sup>2</sup>, Nishanth Mohankumar <sup>1</sup> and Tommaso P. Fraccia <sup>1,3,\*</sup>

<sup>1</sup> IPGG, CBI UMR 8231 – CNRS – ESPCI Paris, PSL Research University, 75005 Paris, France

<sup>2</sup> Department of Chemistry, Columbia University, New York, NY 10027, USA

<sup>3</sup> Department of Pharmacological and Biomolecular Sciences, University of Milan, 20133 Milan, Italy

\* Correspondence: [tommaso.fraccia@unimi.it](mailto:tommaso.fraccia@unimi.it)

## Supplementary Material

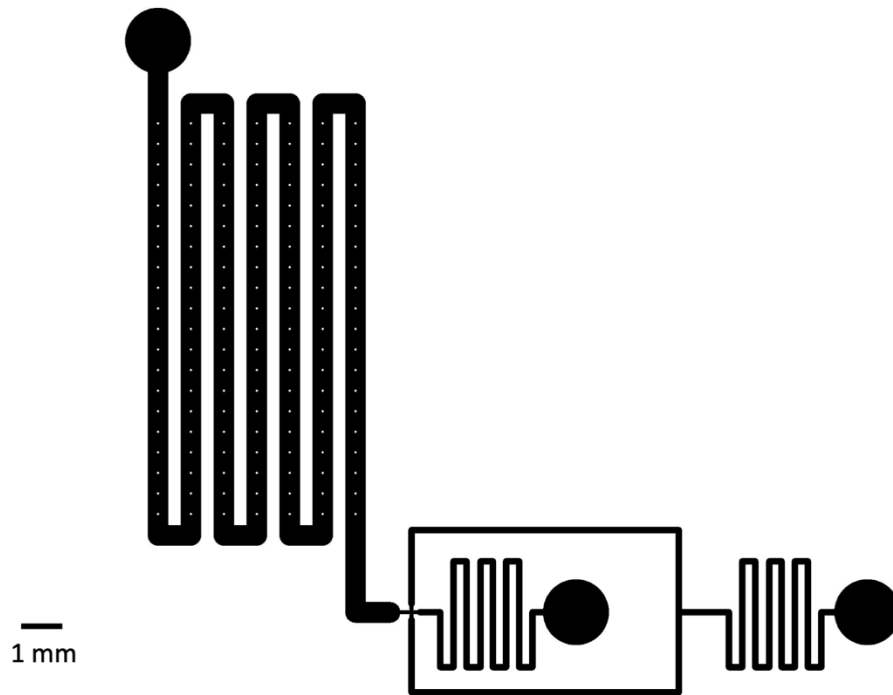

**Supplementary Figure S1.** Lithography mask of chip 1: single layer chip, flow focusing and traps.

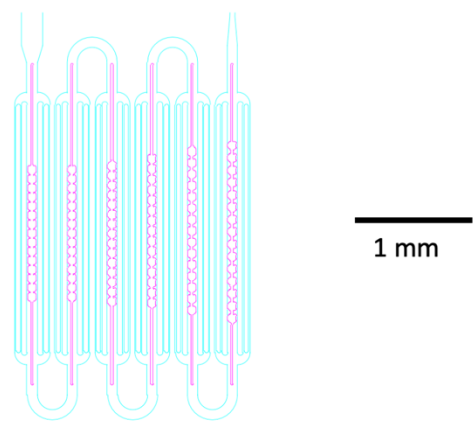

Supplementary Figure S2. Lithography mask of chip 2: upper layer – channels and traps.

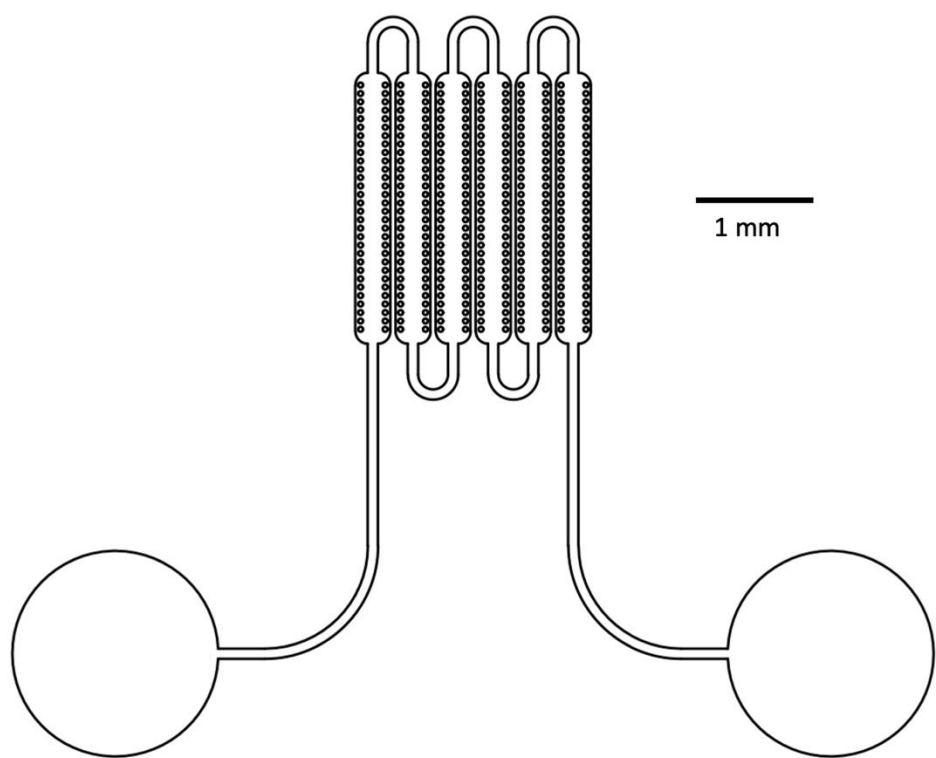

Supplementary Figure S3. Lithography mask of chip 2: bottom layer – reservoir.

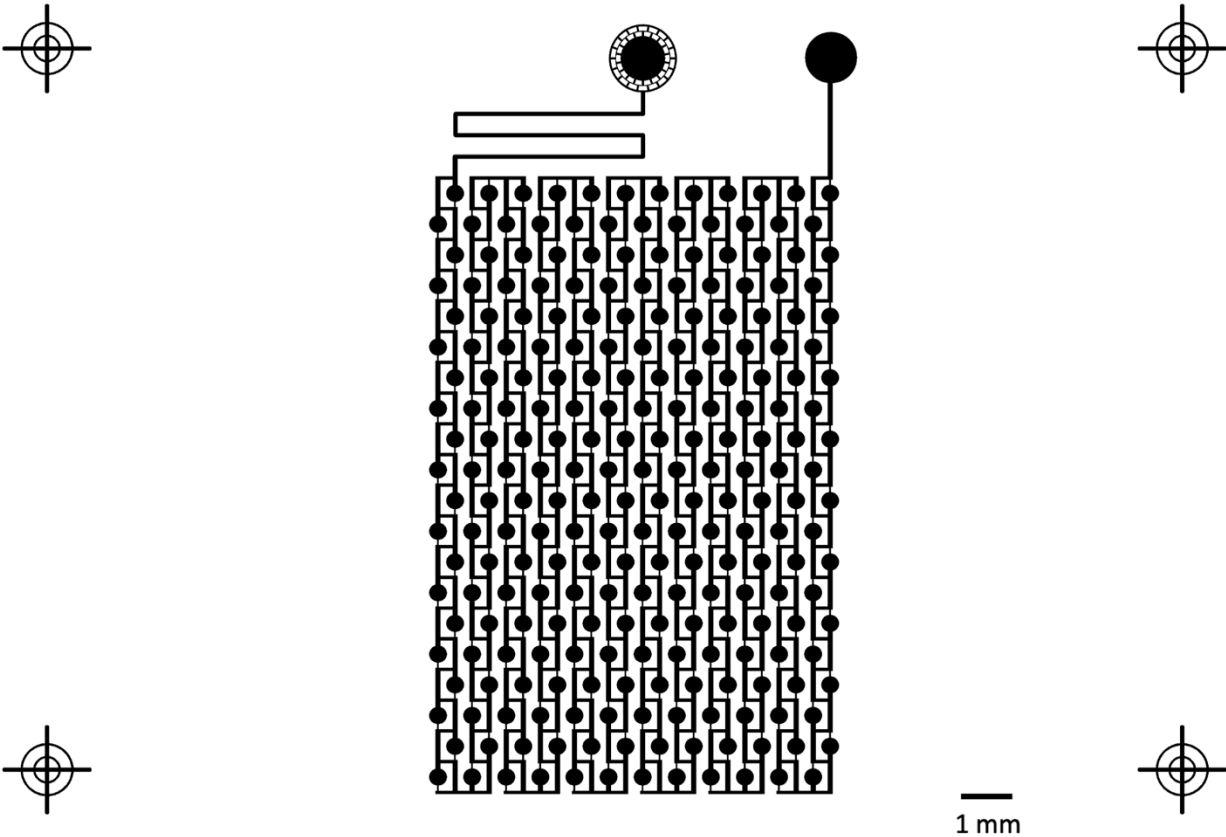

Supplementary Figure S5. Lithography mask of chip 3: upper layer – traps.

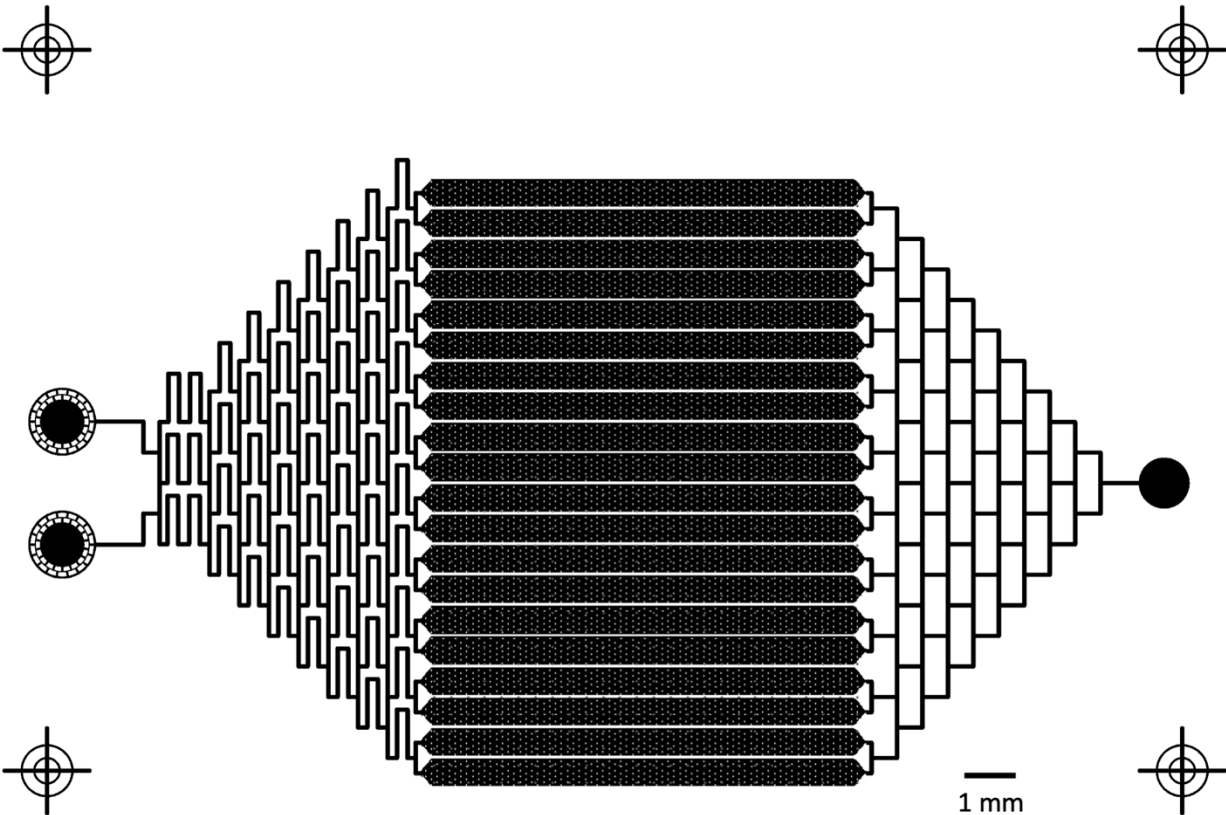

Supplementary Figure S6. Lithography mask of chip 3: bottom layer – reservoir.

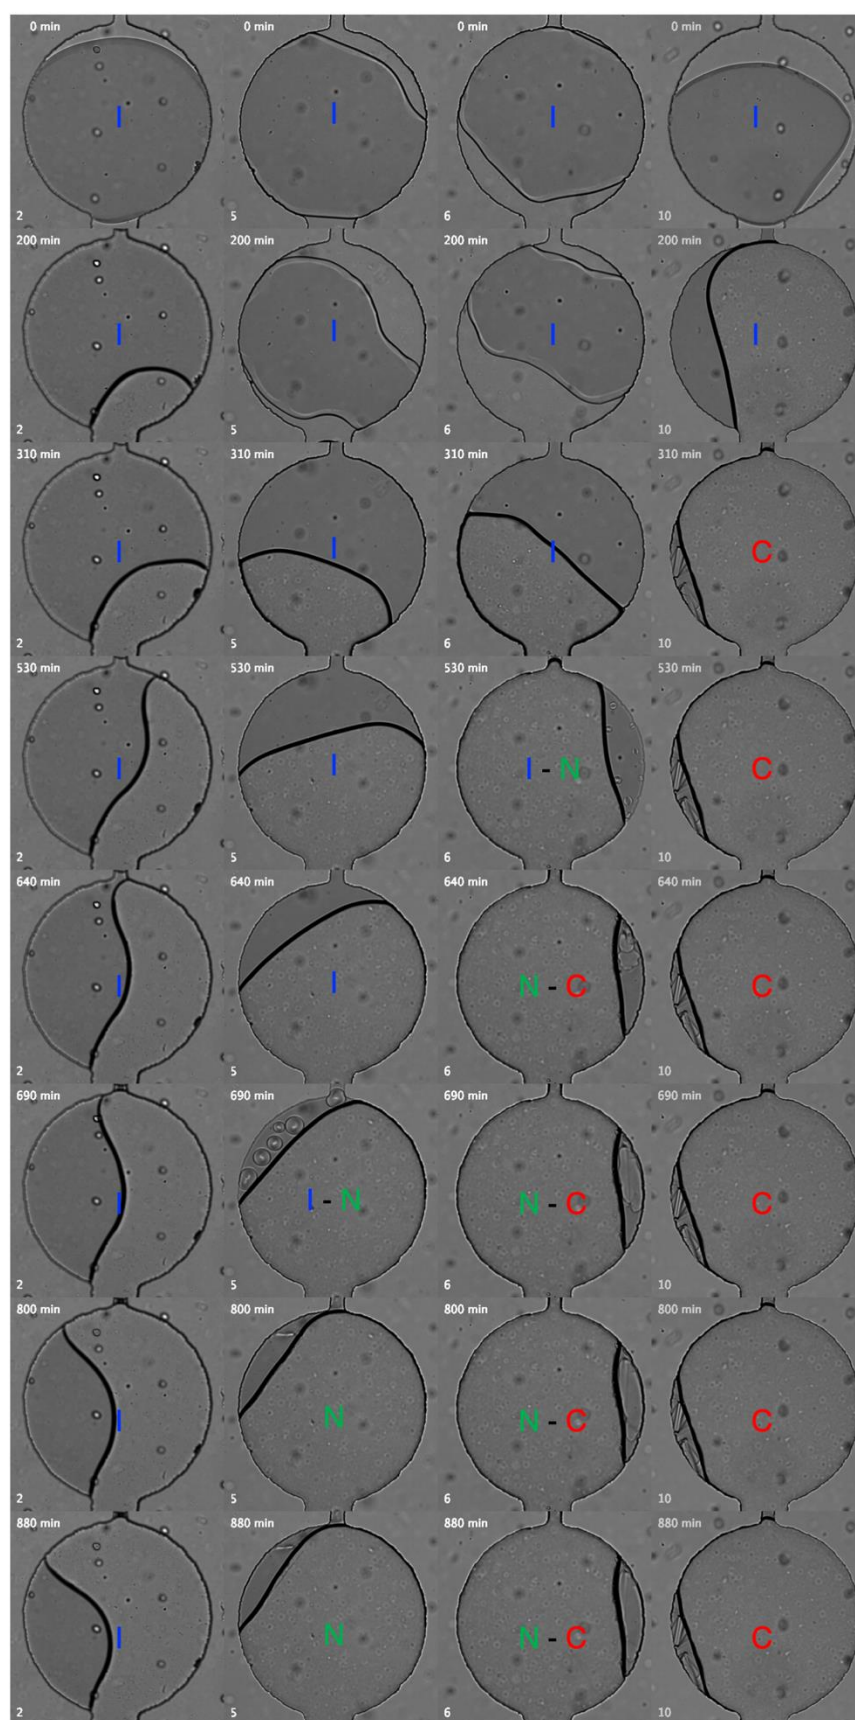

**Supplementary Figure S7.** Bright field microscopy images at different time steps of SSY solutions incubated within chip 3 in correspondence to reservoir channels 2, 5, 6 and 10 (from left to right). Phases identification are reported (I, I - N, N, N - C, C).
